# Supplementary material
Source: PubMed Central journal article supplement (PMC8957702)

## Supplemental Fig

**S-1** Cytotoxicity in high non-Gal Ab baboon serum

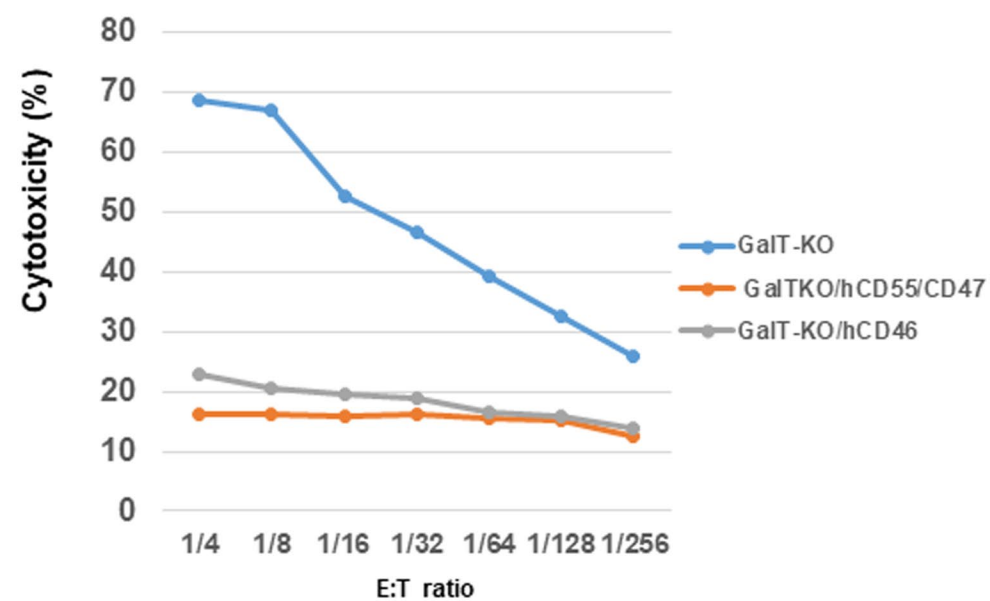

**S-2** Cytotoxicity in internal standard baboon serum

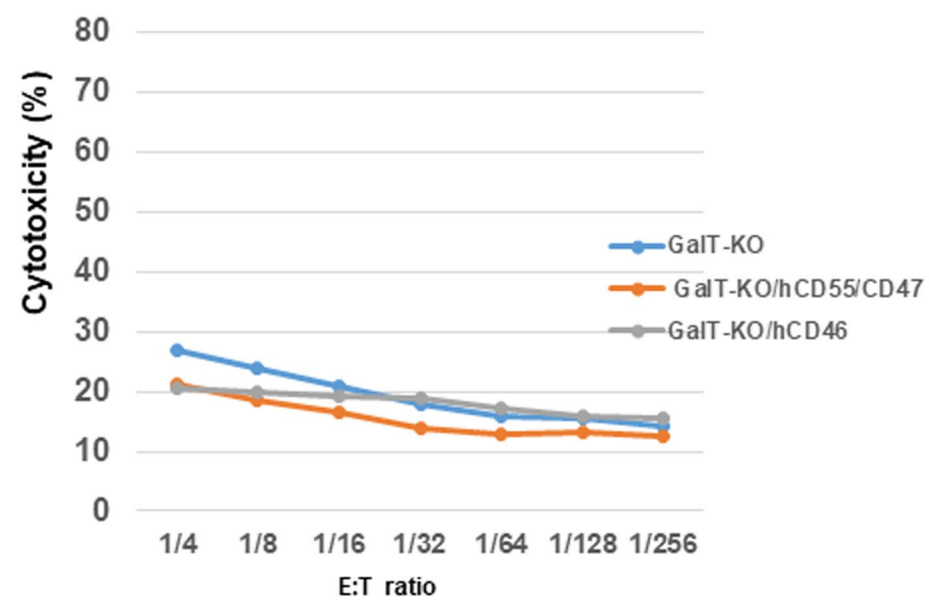

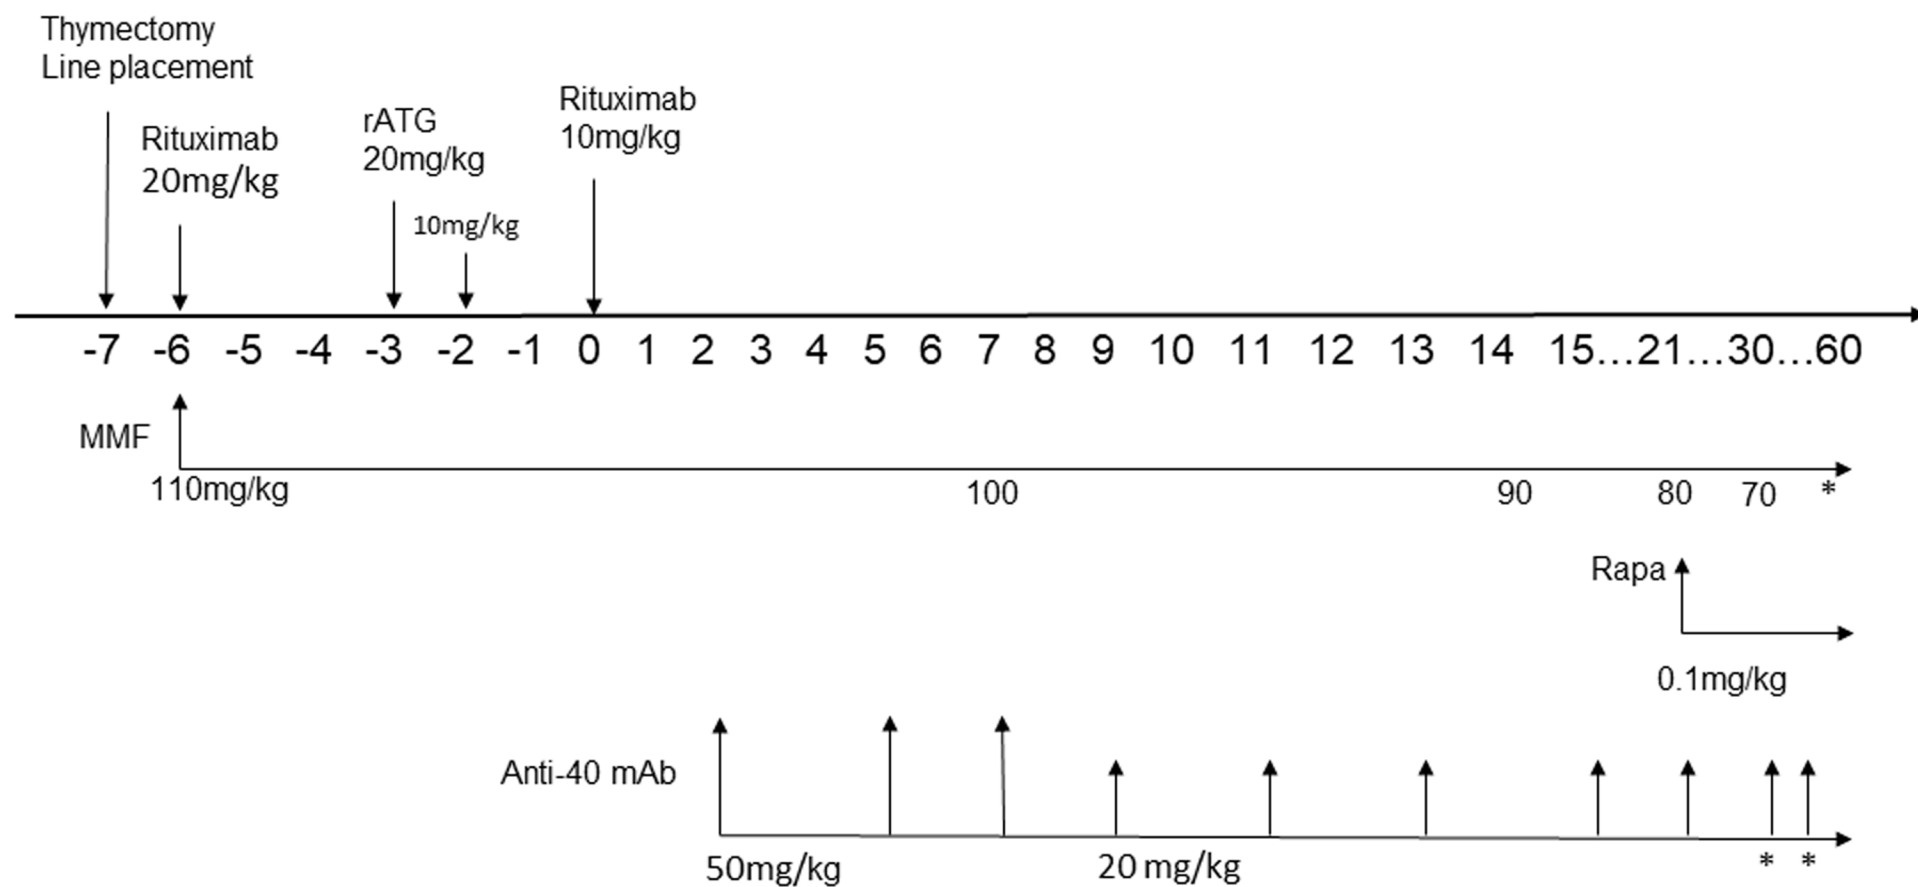

CVF daily for first 2 weeks and then twice a week to maintain CH50 less than 1%.

## Supplemental Fig

S-4

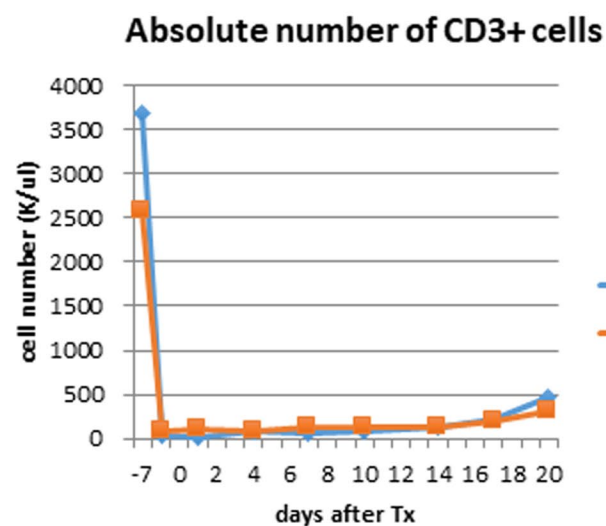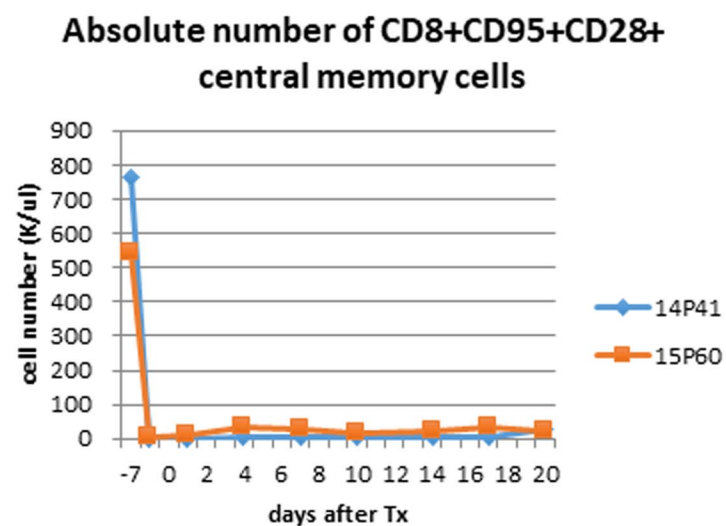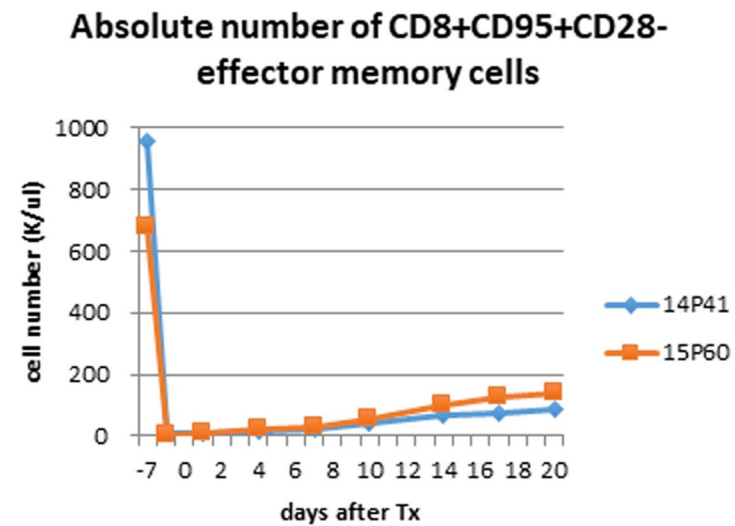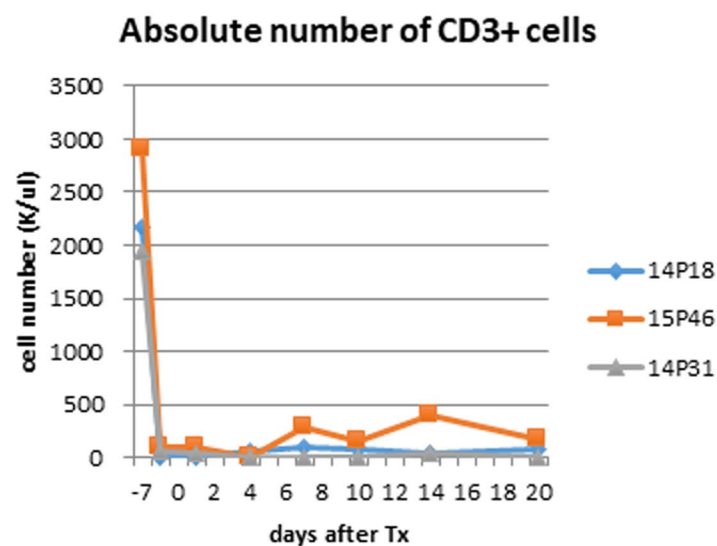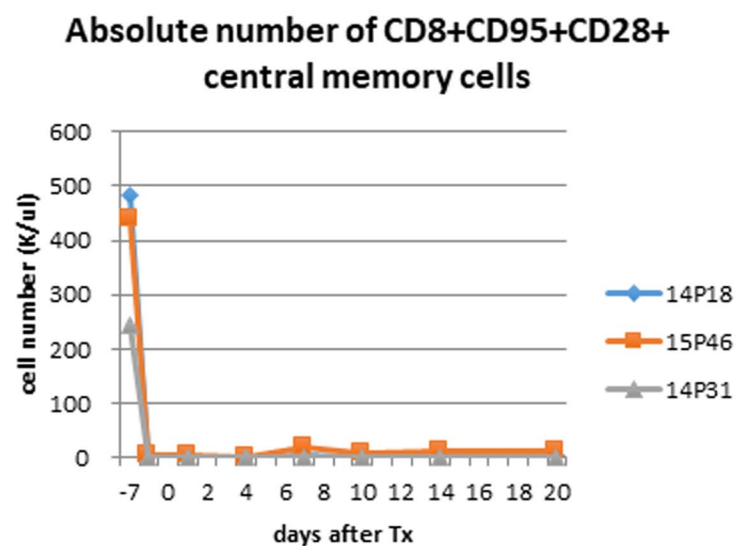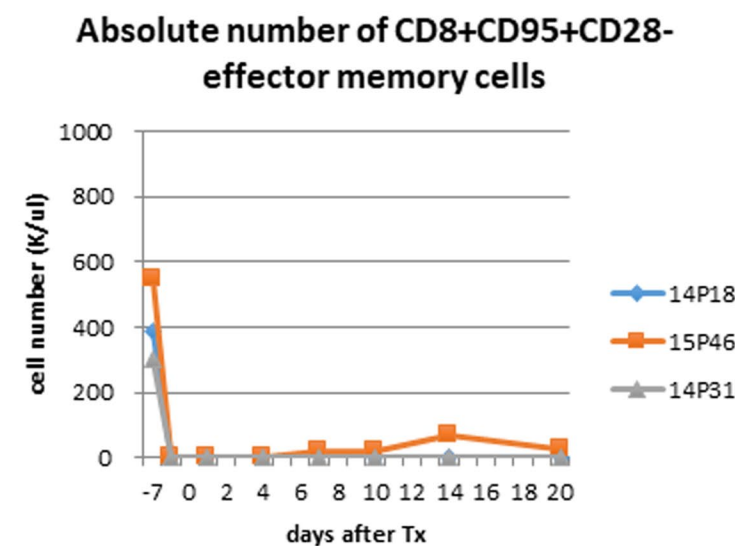

Supplement: NIHMS1785089-supplement-Suppl_Figs.pdf [file NIHMS1785089-supplement-Suppl_Figs.pdf]
