# Supplementary material
Source: PubMed Central journal article supplement (PMC8957702)
Supplement: NIHMS1785089-supplement-Suppl_Table.pdf [file NIHMS1785089-supplement-Suppl_Table.pdf]

**Supplemental Table:****A. The summary of donor transgene and recipients in this study.**

| <b>Pig ID</b>            | <b>Knockout</b>           | <b>Transgenes</b>                        | <b>Number of gene modification (GE)</b> |
|--------------------------|---------------------------|------------------------------------------|-----------------------------------------|
| 14P31<br>14P41           | GalT-KO/<br>CMAH-KO/B4-KO | hTBM, EPCR, hCD47, HO-1                  | 7GE                                     |
| 15P60<br>14P180<br>15P46 | GalT-KO/<br>CMAH-KO/B4-KO | hTBM, EPCR, hCD47, HO-1,<br>hCD46, hCD55 | 9GE                                     |

**B. Cells for screening Ab FCM**

| <b>Screening assay</b> |                                                                                                                             |
|------------------------|-----------------------------------------------------------------------------------------------------------------------------|
| <b>Recipients</b>      | <b>Target cells</b>                                                                                                         |
| All baboons            | mTg Tri KO: GalT-KO/CMAH-KO/B4-KO, hTBM, EPCR, hCD47, HO-1, hCD46, hCD55 (9GE. Syngeneic to kidney donors)<br>GalT-KO alone |
